# Supplementary material for: Natural environments and suicide mortality in the Netherlands: a cross-sectional, ecological study
Source: PubMed Central journal article supplement — Lancet Planet Health. 2018 Mar;2(3):e134–9. doi: 10.1016/S2542-5196(18)30033-0 (PMC5846805; doi:10.1016/s2542-5196(18)30033-0), 2018-03
Supplement: mmc1.pdf [file mmc1.pdf]

# THE LANCET Planetary Health

## Supplementary appendix

This appendix formed part of the original submission and has been peer reviewed.  
We post it as supplied by the authors.

Supplement to: Helbich M, de Beurs D, Kwan M-P, O'Connor R C, Groenewegen P P.  
Natural environments and suicide mortality in the Netherlands: a cross-sectional,  
ecological study. *Lancet Planet Health* 2018; 2: e134–39.

# Supplementary Materials

## Natural Environments and Suicide Mortality in the Netherlands

Marco Helbich, Derek de Beurs, Mei-Po Kwan, Rory C. O'Connor, Peter P. Groenewegen

### Contents

|                                                                            |   |
|----------------------------------------------------------------------------|---|
| 1. Regression model description .....                                      | 1 |
| 2. Descriptive statistics .....                                            | 3 |
| 3. Model diagnostics and sensitivity tests of the Bayesian regression..... | 4 |
| References.....                                                            | 8 |

### 1. Regression model description

Statistical methods to determine the relationship between natural environmental exposures and suicide mortality are numerous, with Bayesian ecological regressions standing out,<sup>1-3</sup> particularly when studying risk and protective factors from a spatial standpoint.<sup>4-11</sup>

Bayesian generalized linear models with random effects were fitted. For the data model, we assumed a Poisson distribution to model suicide counts as an outcome (Eq. 1)<sup>3</sup>. The relative suicide risk ( $\theta_i$ ) was modeled through a set of risk and protective factors ( $x_{ip}$ ) in the process model, whereas area-specific effects were further decomposed additively into a spatially structured ( $u_i$ ) and an unstructured ( $v_i$ ) component (Eq. 2). Such a model can smooth the relative (residual) suicide risk by sharing information across spatial units (i.e., municipalities).<sup>2,12</sup> The model is given by:

$$Y_i \sim \text{Poisson}(E_i \theta_i) \quad (1)$$

$$\ln(\theta_i) = \beta_1 + \beta_2 x_i + \dots + \beta_p x_{ip} + u_i + v_i \quad (2)$$

$Y_i$  refers to the number of suicides in municipality  $i$  ( $i = 1, \dots, 398$ ) and  $E_i$  is the age-adjusted indirectly standardized expected number of suicide cases.  $\theta_i$  refers to the relative risk of having a suicide in area  $i$ . Besides adjusting for the covariates  $x_p$ , a structured random effect  $u_i$  was included to model spatial dependence among adjacent areas while an unstructured random effect  $v_i$  incorporated area-specific heterogeneity.<sup>13</sup> Omitting spatial dependence among adjacent areas, where present, would have severely biased the estimation of the regression parameters.<sup>2</sup>

Prior distributions for the unknown random parameters were assigned as follows. For the fixed effects,  $\beta_p$  diffuse priors based on normal distributions with mean zero and different precisions including 0.01, 0.001, and 0.0001 were investigated. The structured random effect  $u_i$  followed an intrinsic conditional autoregressive prior. Adjacency was operationalized as first-order queen contiguity where areas are considered neighbors when they share a common topological point or boundary.<sup>5</sup> Model robustness checks with an alternative neighbor specification, specifically the rook contiguity, was also carried out.<sup>14,15</sup> For the unstructured random effect  $v_i$  a normal prior with an exchangeable structure was chosen. Due to a lack of prior knowledge, non-informative priors based on a logged gamma distribution were specified for both  $u_i$  and  $v_i$ .<sup>12</sup> To ease the prior specification, the structured effect was additionally scaled.<sup>16</sup> As Bayesian models can be sensitive to prior specifications, sensitivity tests are obligatory.<sup>17</sup> We tested a range of alternative log-gamma( $a$ ;  $b$ ) priors with a shape  $a$  of 0.7, 1, and 1.3 as well as a precision  $b$  of 0.005, 0.0005, and 0.00005.

To obtain descriptive statistics of the marginal posterior distributions, Bayesian inference was carried out with the integrated nested Laplace approximation (INLA) approach.<sup>18</sup> INLA is a highly accurate and computationally fast alternative to Markov chain Monte Carlo methods while supporting numerous complex models.<sup>19</sup> The models were estimated with the R-INLA library (17.06.20) in R 3.4.2 (64 bit).<sup>20</sup> Relative risk estimates for  $\beta_p$  were obtained through the posterior means accompanied by the 95% credibility intervals (CI) for parameter uncertainty. To evaluate alternative prior specifications and to compare different models with a different degree of adjustment, the Watanabe–

Akaike information criterion (WAIC)<sup>21</sup> and the deviance information criterion (DIC)<sup>22</sup> were used.

Both performance measures consider a penalty term adjusting for model complexity. Lower DIC and WAIC scores refer to a better model fit.

## 2. Descriptive statistics

Supplementary Table S1 reports descriptive statistics for the involved variables. Summary statistics and histograms were used to divide the environmental variables into three groups. Grouping the data is favorable by skewed distributions while permitting the analysis of dose–response relationships.

Supplementary Table S1: Descriptive statistics of the variables

|                                 | Minimum | 25 <sup>th</sup><br>percentile | Median | 75 <sup>th</sup><br>percentile | Maximum | Category<br>(%) |
|---------------------------------|---------|--------------------------------|--------|--------------------------------|---------|-----------------|
| Suicide cases 2005–14*          | 6.00    | 14.00                          | 25.00  | 40.80                          | 898.00  |                 |
| Average population<br>2005-14   | 1,508   | 16,578                         | 25,770 | 42,848                         | 776,860 |                 |
| <i>Environmental variables:</i> |         |                                |        |                                |         |                 |
| Green space: low                |         |                                |        |                                |         | 6               |
| Mid                             |         |                                |        |                                |         | 69              |
| High                            |         |                                |        |                                |         | 25              |
| Blue space: low                 |         |                                |        |                                |         | 24              |
| Mid                             |         |                                |        |                                |         | 55              |
| High                            |         |                                |        |                                |         | 21              |
| Coastal proximity: low          |         |                                |        |                                |         | 25              |
| Mid                             |         |                                |        |                                |         | 50              |
| High                            |         |                                |        |                                |         | 25              |
| <i>Covariates:</i>              |         |                                |        |                                |         |                 |
| Urbanicity: urban               |         |                                |        |                                |         | 27              |
| Rural                           |         |                                |        |                                |         | 73              |
| Male (%)                        | 46.78   | 49.19                          | 49.78  | 50.23                          | 52.25   |                 |
| Divorce (%)                     | 1.80    | 4.93                           | 6.00   | 7.30                           | 11.60   |                 |
| Unemployed (%)                  | 3.40    | 4.30                           | 4.80   | 5.60                           | 10.10   |                 |
| Housing prices (in<br>€1,000)   | 116.00  | 182.00                         | 216.00 | 252.80                         | 565.00  |                 |
| Supply of GPs (km)              | 0.40    | 0.80                           | 1.00   | 1.30                           | 2.90    |                 |
| Orthodox Protestant (%)         | 0.00    | 0.10                           | 0.20   | 1.36                           | 33.40   |                 |

\* Note that municipalities with  $\leq 5$  suicide cases were censored

### 3. Model diagnostics and sensitivity tests of the Bayesian regression

Non-spatial regressions were initially fitted. Residual independence was not confirmed across the models by Moran's  $I$  statistics ( $I$ : 0.146;  $p < 0.001$ ), supporting the application of spatially explicit models. In order to evaluate the sensitivity of different prior specifications, the fully adjusted model 2 was re-estimated with the aforementioned priors. In total, 27 models were fitted for this sensitivity study. For the spatially structured ( $u_i$ ) and unstructured ( $v_i$ ) components, different priors with different shape  $a$  and precision  $b$  were tested. For the fixed effects,  $\beta_p$  different precisions  $k$  were tested. The model fits are shown in Supplementary Table S2. As indicated by the WAIC and DIC scores, the models showed minor variations in the goodness-of-fit with different prior specifications. The best fitting model (i.e., lowest WAIC score) was used in the paper.

Supplementary Table S2: Goodness-of-fit measures associated with the fully adjusted model 2 and different prior specifications for the structured, unstructured, and fixed effects

| $a$   | $b$   | $k$   | WAIC      | DIC       |
|-------|-------|-------|-----------|-----------|
| 0.700 | 0.005 | 0.000 | 2,501.532 | 2,499.633 |
| 0.700 | 0.005 | 0.001 | 2,501.534 | 2,499.633 |
| 0.700 | 0.005 | 0.010 | 2,501.536 | 2,499.633 |
| 1.000 | 0.005 | 0.010 | 2,502.711 | 2,499.868 |
| 1.000 | 0.005 | 0.001 | 2,502.712 | 2,499.872 |
| 1.000 | 0.005 | 0.000 | 2,502.720 | 2,499.871 |
| 1.300 | 0.005 | 0.000 | 2,503.909 | 2,500.138 |
| 1.300 | 0.005 | 0.010 | 2,503.914 | 2,500.138 |
| 1.300 | 0.005 | 0.001 | 2,503.918 | 2,500.139 |
| 0.700 | 0.000 | 0.010 | 2,507.779 | 2,501.400 |
| 0.700 | 0.000 | 0.000 | 2,507.789 | 2,501.402 |
| 0.700 | 0.000 | 0.001 | 2,507.801 | 2,501.407 |
| 1.000 | 0.000 | 0.000 | 2,510.241 | 2,502.363 |
| 1.000 | 0.000 | 0.010 | 2,510.252 | 2,502.369 |
| 1.000 | 0.000 | 0.001 | 2,510.263 | 2,502.366 |
| 0.700 | 0.000 | 0.000 | 2,510.696 | 2,502.267 |
| 0.700 | 0.000 | 0.010 | 2,510.702 | 2,502.270 |
| 0.700 | 0.000 | 0.001 | 2,510.708 | 2,502.272 |
| 1.300 | 0.000 | 0.010 | 2,510.869 | 2,502.341 |
| 1.300 | 0.000 | 0.000 | 2,510.870 | 2,502.342 |

|       |       |       |           |           |
|-------|-------|-------|-----------|-----------|
| 1.300 | 0.000 | 0.001 | 2,510.871 | 2,502.342 |
| 1.000 | 0.000 | 0.001 | 2,512.334 | 2,502.990 |
| 1.000 | 0.000 | 0.000 | 2,512.341 | 2,502.993 |
| 1.000 | 0.000 | 0.010 | 2,512.347 | 2,502.996 |
| 1.300 | 0.000 | 0.010 | 2,513.635 | 2,503.439 |
| 1.300 | 0.000 | 0.001 | 2,513.637 | 2,503.440 |
| 1.300 | 0.000 | 0.000 | 2,513.639 | 2,503.440 |

Supplementary Figure S3 shows the posterior densities of each fixed effect for the 9 best performing models in Table S2 with different alternative priors. The alternative priors showed very close agreement.

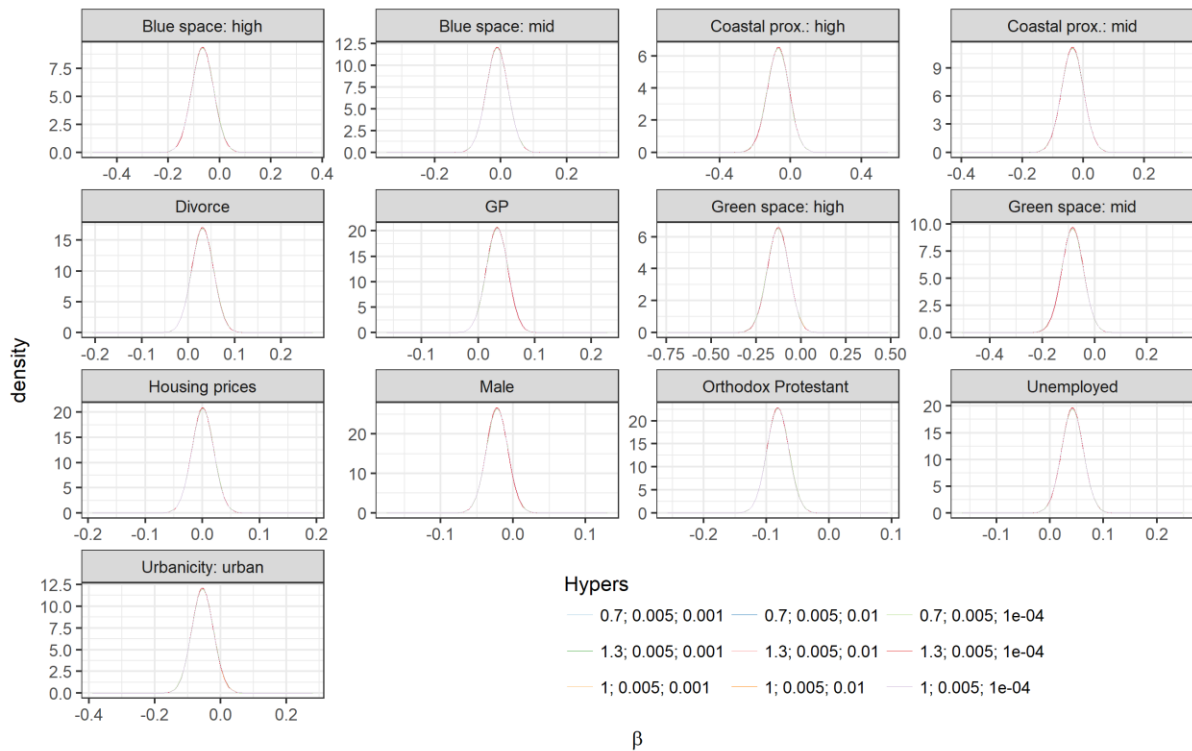

Supplementary Figure S3: Posterior densities of the 9 best performing models (the first value refers to hyperparameter  $a$ , the second to  $b$ , and the third to  $k$ )

Supplementary Figure S4 shows the posterior means along with the 95% CIs for the first 9 models. No significant differences were obtained. Supplementary Figure S5 plots the posterior marginal distribution of tau and sigma for the best fitting model, which is also used in the paper.

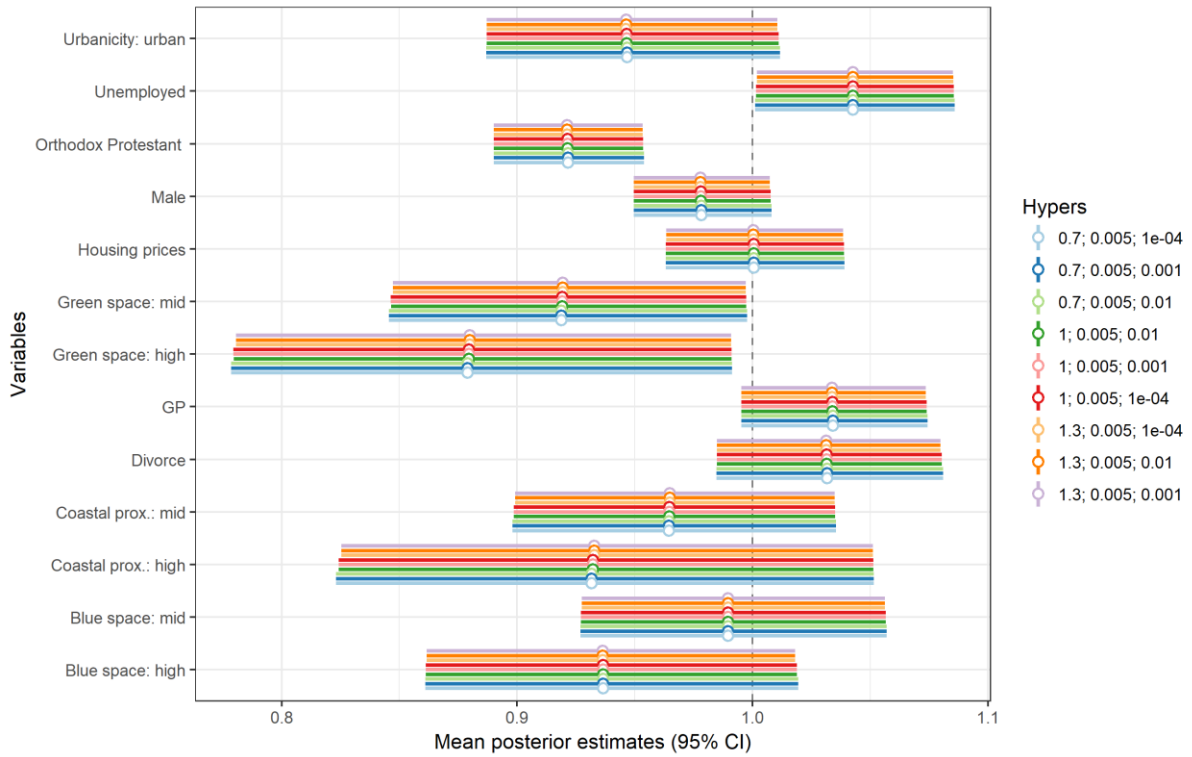

Supplementary Figure S4: Posterior means and 95% CIs for the first 9 best performing models (the first value refers to hyperparameter  $a$ , the second to  $b$ , and the third to  $k$ )

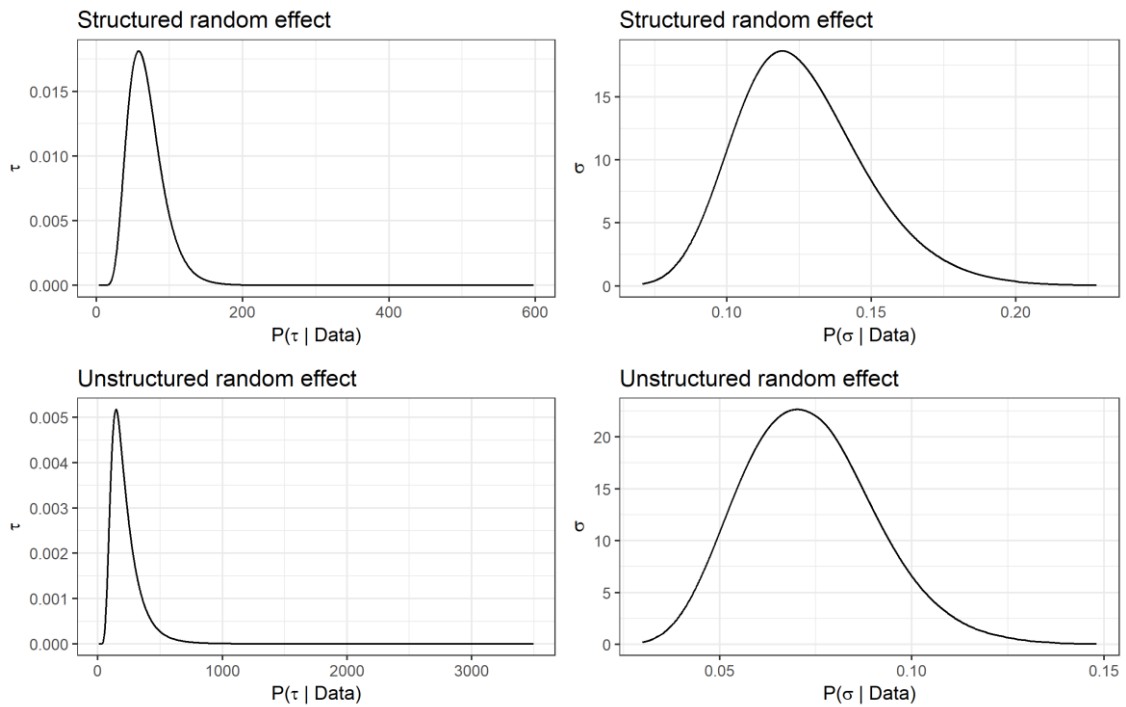

Supplementary Figure S5: Posterior marginal distribution of tau and sigma for the best fitting model

We also tested model sensitivity concerning two neighborhood specifications (i.e., rook vs. queen adjacency). As indicated by the descriptive statistics of the neighborhood matrices (Table S6), both specifications are similar. Therefore, it was not surprising that switching between the queen and the rook case did not translate into substantial differences in the posterior distributions. We followed the majority of studies and utilized queen contiguity as adjacency definition.<sup>5,6,12</sup>

Supplementary Table S6: Summary statistics of two neighborhood matrices

|                                | Rooks's case | Queen's case |
|--------------------------------|--------------|--------------|
| Number of non-zero links       | 2,090        | 2,082        |
| Percentage of non-zero weights | 1.319        | 1.314        |
| Average number of links        | 5.251        | 5.231        |

The residual relative suicide risk of the fully adjusted model is shown in Figure S7 (left panel) next to the relative risk of the unadjusted model (right panel). Both maps show the sum of the structured and the unstructured effect.

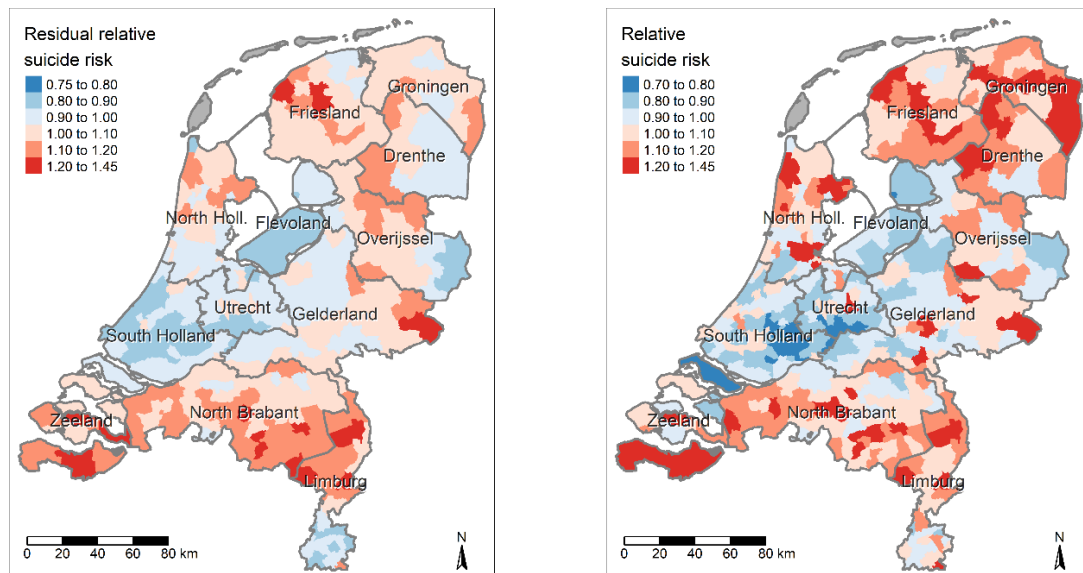

Supplementary Figure S7: Residual relative risk of the fully adjusted model (left panel) and the unadjusted model (right panel) per municipality



Supplementary Table S8: Model 2 with a green space–urbanicity interaction

|                                   | Relative risk | 2.5% CI | 97.5% CI |
|-----------------------------------|---------------|---------|----------|
| Intercept                         | 1.163         | 1.016   | 1.331    |
| Green space (ref.=low): mid       | 0.864         | 0.770   | 0.969    |
| Green space: high                 | 0.836         | 0.723   | 0.965    |
| Green space: mid × urban          | 1.122         | 0.968   | 1.300    |
| Green space: high × urban         | 1.057         | 0.851   | 1.310    |
| Urbanicity (ref.=rural): urban    | 0.870         | 0.763   | 0.992    |
| Blue space (ref.=low): mid        | 0.988         | 0.925   | 1.056    |
| Blue space: high                  | 0.937         | 0.861   | 1.020    |
| Coastal proximity (ref.=low): mid | 0.967         | 0.900   | 1.038    |
| Coastal proximity: high           | 0.930         | 0.821   | 1.050    |
| Male                              | 0.981         | 0.952   | 1.011    |
| Divorce                           | 1.038         | 0.990   | 1.088    |
| Unemployed                        | 1.045         | 1.004   | 1.089    |
| Housing prices                    | 1.003         | 0.966   | 1.042    |
| Supply of GPs                     | 1.036         | 0.997   | 1.077    |
| Orthodox Protestant               | 0.926         | 0.894   | 0.959    |

## References

- 1 Gelman A, Carlin JB, Stern HS, Dunson DB, Vehtari A, Rubin DB. Bayesian data analysis. CRC press Boca Raton, FL, 2014.
- 2 Lawson AB. Bayesian disease mapping: Hierarchical modeling in spatial epidemiology. CRC press, 2013.
- 3 Wakefield J. Disease mapping and spatial regression with count data. *Biostatistics* 2006; **8**: 158–83.
- 4 Hsu C-Y, Chang S-S, Lee EST, Yip PSF. Geography of suicide in Hong Kong: spatial patterning, and socioeconomic correlates and inequalities. *Soc Sci Med* 2015; **130**: 190–203.
- 5 Helbich M, Blüml V, de Jong T, Plener PL, Kwan M-P, Kapusta ND. Urban-rural inequalities in suicide mortality: a comparison of urbanicity indicators. *Int J Health Geogr* 2017; **16**.
- 6 Blüml V, Helbich M, Mayr M, *et al*. Antidepressant sales and regional variations of suicide mortality in Germany. *J Psychiatr Res* 2017; **87**. DOI:10.1016/j.jpsychires.2016.12.013.
- 7 Congdon P. Explaining the spatial pattern of suicide and self-harm rates: a case study of east

- and south east England. *Appl Spat Anal Policy* 2011; **4**: 23–43.
- 8 Pirkola S, Sund R, Sailas E, Wahlbeck K. Community mental-health services and suicide rate in Finland: a nationwide small-area analysis. *Lancet* 2009; **373**: 147–53.
- 9 Qi X, Hu W, Mengersen K, Tong S. Socio-environmental drivers and suicide in Australia: Bayesian spatial analysis. *BMC Public Health* 2014; **14**: 681.
- 10 Yoon T-H, Noh M, Han J, Jung-Choi K, Khang Y-H. Deprivation and suicide mortality across 424 neighborhoods in Seoul, South Korea: a Bayesian spatial analysis. *Int J Public Health* 2015; **60**: 969–76.
- 11 Helbich M, Plener PL, Hartung S, Blüml V. Spatiotemporal suicide risk in Germany: a longitudinal study 2007-11. *Sci Rep* 2017; **7**. DOI:10.1038/s41598-017-08117-4.
- 12 Blangiardo M, Cameletti M, Baio G, Rue H. Spatial and spatio-temporal models with R-INLA. *Spat Spatiotemporal Epidemiol* 2013; **7**: 39–55.
- 13 Besag J, York J, Mollié A. Bayesian image restoration, with two applications in spatial statistics. *Ann Inst Stat Math* 1991; **43**: 1–20.
- 14 Earnest A, Morgan G, Mengersen K, Ryan L, Summerhayes R, Beard J. Evaluating the effect of neighbourhood weight matrices on smoothing properties of conditional autoregressive (CAR) models. *Int J Health Geogr* 2007; **6**: 54.
- 15 Duncan EW, White NM, Mengersen K. Spatial smoothing in Bayesian models: a comparison of weights matrix specifications and their impact on inference. *Int J Health Geogr* 2017; **16**: 47.
- 16 Sørbye SH, Rue H. Scaling intrinsic Gaussian Markov random field priors in spatial modelling. *Spat Stat* 2014; **8**: 39–51.
- 17 Carroll R, Lawson AB, Faes C, Kirby RS, Aregay M, Watjou K. Comparing INLA and OpenBUGS for hierarchical Poisson modeling in disease mapping. *Spat Spatiotemporal Epidemiol* 2015; **14**: 45–54.
- 18 Rue H, Martino S, Chopin N. Approximate bayesian inference for latent Gaussian models by using integrated nested Laplace approximations. *J R Stat Soc Ser b* 2009; **71**: 319–92.
- 19 Rue H, Riebler A, Sørbye SH, Illian JB, Simpson DP, Lindgren FK. Bayesian computing with

- INLA: a review. *Annu Rev Stat Its Appl* 2017; **4**: 395–421.
- 20 R Core Team. R: a language and environment for statistical computing. 2017. <https://www.r-project.org/>.
- 21 Gelman A, Hwang J, Vehtari A. Understanding predictive information criteria for Bayesian models. *Stat Comput* 2014; **24**: 997–1016.
- 22 Spiegelhalter DJ, Best NG, Carlin BP, Linde A. The deviance information criterion: 12 years on. *J R Stat Soc Ser B* 2014; **76**: 485–93.
